# Supplementary material for: Association between sex hormones and anti-S/RBD antibody responses to COVID-19 vaccines in healthcare workers
Source: PubMed Central journal article supplement — Hum Vaccin Immunother. 2023 Nov 14;19(3):2273697. doi: 10.1080/21645515.2023.2273697 (PMC10760357; doi:10.1080/21645515.2023.2273697), 2023-11-14
Supplement: KHVI_A_2273697_SM2222.pdf [file KHVI_A_2273697_SM2222.pdf]

**Table S1.** Medians, IQR and ranges of anti-S/RBD antibody concentrations (AU/mL) at the three planned measurements post second dose of vaccine.

|                                      | <b>I measurement<br/>median<br/>(IQR);(range)</b> | <b>II measurement<br/>median<br/>(IQR);(range)</b> | <b>III measurement<br/>median<br/>(IQR);(range)</b> |
|--------------------------------------|---------------------------------------------------|----------------------------------------------------|-----------------------------------------------------|
| <b>days since II vaccination</b>     | 16<br>(15-17); (12-37)                            | 77<br>(76-78); (34-101)                            | 154<br>(151-156); (122-243)                         |
| <b>Anti-S antibodies for:</b>        |                                                   |                                                    |                                                     |
| all individuals                      | 2.343<br>(1,516-3,531); (66-9,801)                | 563<br>(341-888); (36-2,914)                       | 180<br>(107-303); (3-1,475)                         |
| males                                | 1.697<br>(1,094-2,696); (124-6,937)               | 402<br>(288-709); (40-2,659)                       | 146<br>(94-251); (1-155)                            |
| females                              | 2.948<br>(1,706-3,746); (66-9,801)                | 621<br>(380-953); (36-2,914)                       | 197<br>(114-322); (3-1,475)                         |
| <b>p-values<br/>males vs females</b> | <b>&lt;0.001</b>                                  | <b>&lt;0.001</b>                                   | <b>0.001</b>                                        |
| <b>age groups</b>                    |                                                   |                                                    |                                                     |
| 20-44                                | 2.509<br>(1,645-3,754); (152-9,801)               | 636<br>(395-935); (36-2,659)                       | 204<br>(121-346); (16-1,155)                        |
| 45-55                                | 2.173<br>(1,498-3,155); (282-9,248)               | 501<br>(308-854); (77-2,286)                       | 158<br>(95-282); (30-901)                           |
| 56-85                                | 1.917<br>(1,096-3,101); (66-7,525)                | 436<br>(268-832); (40-2,914)                       | 144<br>(80-244); (3-1,475)                          |
| <b>p-values<br/>age groups</b>       | <b>0.019</b>                                      | <b>0.015</b>                                       | <b>0.003</b>                                        |
| <b>males aged:</b>                   |                                                   |                                                    |                                                     |
| 20-44                                | 1.901<br>(1,300-2,801); (157-6,937)               | 460<br>(345-766); (48-2,659)                       | 178<br>(109-290); (19-1,155)                        |
| 45-55                                | 1.596<br>(999-2,437); (282-5,058)                 | 381<br>(282-570); (96-1,340)                       | 126<br>(83-257); (31-473)                           |
| 56-85                                | 1.257<br>(726-2,978); (124-6,734)                 | 302<br>(199-689); (40-1,776)                       | 111<br>(77-166); (15-779)                           |
| <b>p-values<br/>age groups</b>       | <b>0.460</b>                                      | <b>0.086</b>                                       | <b>0.038</b>                                        |
| <b>females aged:</b>                 |                                                   |                                                    |                                                     |
| 20-44                                | 2.646<br>(1,814-3,952); (152-9,801)               | 668<br>(411-985); (36-2,541)                       | 209<br>(134-363); (16-1,112)                        |
| 45-55                                | 2.258<br>(1,663-3,621); (289-9,248)               | 543<br>(341-913); (77-2,286)                       | 169<br>(96-293); (30-901)                           |
| 56-85                                | 2.395<br>(1,313-3,458); (66-7,525)                | 601<br>(332-930); (40-2,914)                       | 173<br>(93-305); (3-1,475)                          |
| <b>p-values<br/>age groups</b>       | <b>0.136</b>                                      | <b>0.238</b>                                       | <b>0.071</b>                                        |
