# Supplementary figures and images for: Association between sex hormones and anti-S/RBD antibody responses to COVID-19 vaccines in healthcare workers
Source: PubMed Central journal article supplement — Hum Vaccin Immunother. 2023 Nov 14;19(3):2273697. doi: 10.1080/21645515.2023.2273697 (PMC10760357; doi:10.1080/21645515.2023.2273697), 2023-11-14

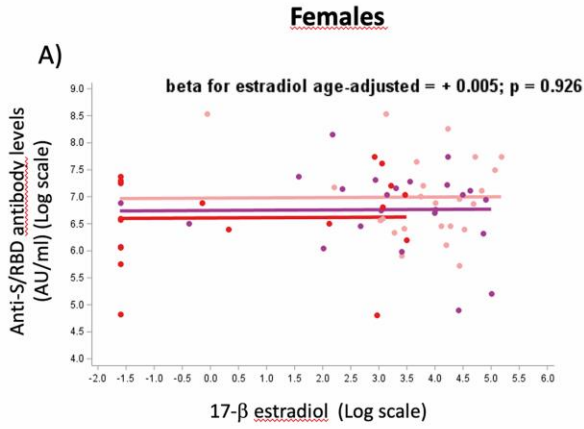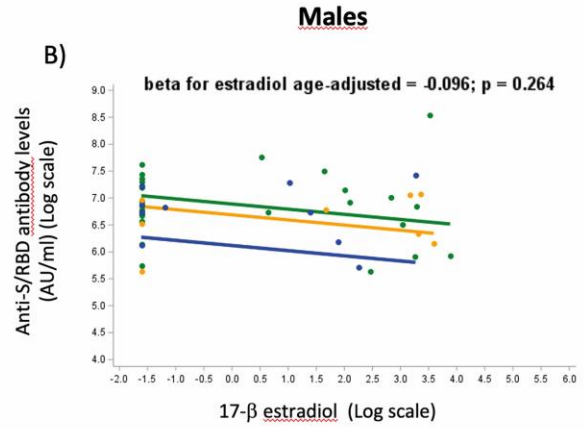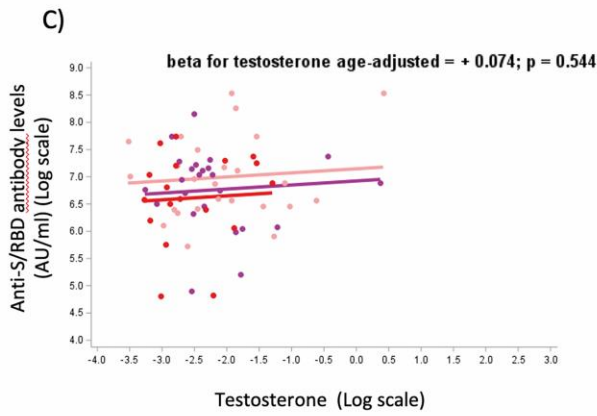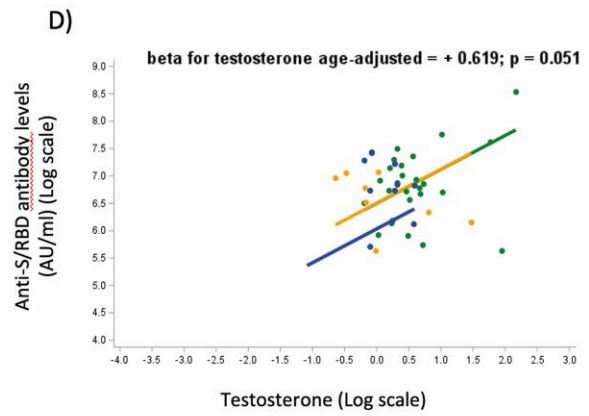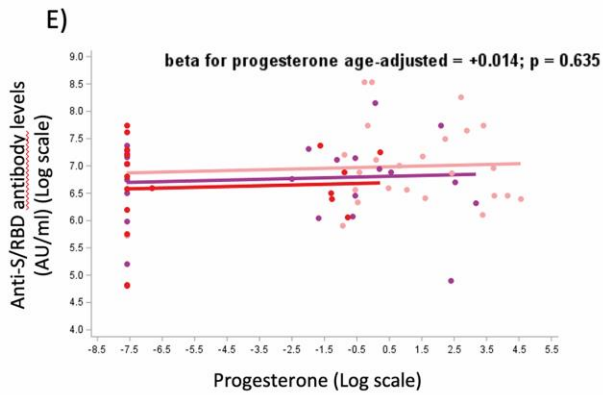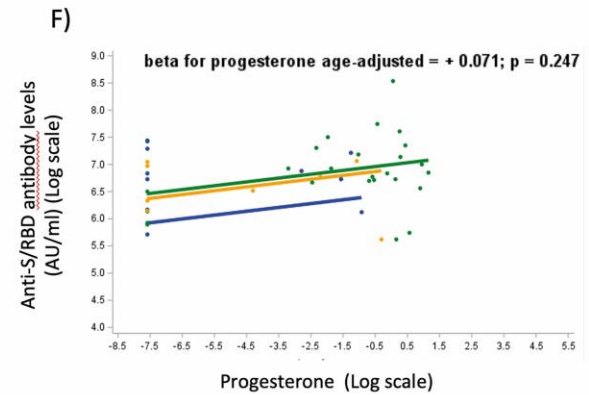

age (20-44) (45-55) (56-85)

age (20-44) (45-55) (56-85)

Supplement: KHVI_A_2273697_SM2216.pdf [file KHVI_A_2273697_SM2216.pdf]
